# Supplementary material for: Development and validation of a novel model for predicting the survival of bladder cancer based on ferroptosis-related genes
Source: Aging (Albany NY). 2022 Nov 17;14(22):9037–55. doi: 10.18632/aging.204385 (PMC9740359; doi:10.18632/aging.204385)
Supplement: Supplementary Table 2 [file aging-14-204385-s003.xlsx]

## Sheet: Supplementary Table 2
Supplementary Table 2. Differentially expressed FRGs in the TCGA dataset.
Gene	logFC	AveExpr	t	P.Value	adj.P.Val	B	type
VDAC2	-12.0734	24.6422	-4.65982	4.23151e-06	4.391e-05	3.25253	downregulate
NRAS	5.9781	16.7034	3.21193	0.0014179	0.00759293	-2.22924	Upregulate
SLC38A1	9.77769	21.3158	3.32611	0.000956536	0.00543009	-1.86584	Upregulate
NCOA4	-19.7422	39.3826	-4.34043	1.7761e-05	0.000160045	1.88321	downregulate
ALOX12	-5.67196	2.81738	-3.64661	0.000298408	0.00197613	-0.781647	downregulate
ALOX15B	-5.92906	2.14306	-3.90299	0.000110317	0.000822051	0.152935	downregulate
PHKG2	2.2949	5.53756	3.61217	0.000339637	0.00220816	-0.90267	Upregulate
ACO1	-3.86967	6.64602	-3.4483	0.000619945	0.00372909	-1.4636	downregulate
GABARAPL1	-17.2069	14.0676	-8.93544	1.21386e-17	3.66473e-16	29.2034	downregulate
ATG16L1	-1.04598	4.63289	-3.08801	0.002146	0.0108717	-2.60993	downregulate
WIPI2	3.47539	11.2539	3.93356	9.76103e-05	0.000736731	0.268315	Upregulate
SNX4	5.25187	14.981	3.95146	9.08265e-05	0.000691504	0.33627	Upregulate
BID	8.05426	13.78	4.4462	1.1149e-05	0.000105296	2.32685	Upregulate
ZEB1	-14.2636	2.82949	-12.6181	2.94255e-31	2.16043e-29	60.1879	downregulate
CDKN2A	14.004	14.3254	2.68098	0.00762397	0.0315806	-3.75912	Upregulate
CDO1	-1.9678	0.760764	-3.48389	0.000545056	0.00333888	-1.34386	downregulate
MAPK9	-1.00261	4.40694	-2.91038	0.00379812	0.0174857	-3.13063	downregulate
CHAC1	2.40474	3.0047	3.06518	0.00231291	0.0115691	-2.6785	Upregulate
MAPK14	-3.00139	9.58318	-3.36121	0.000845619	0.00487694	-1.75171	downregulate
PRKAA2	-1.93214	0.445315	-11.157	1.50253e-25	7.59665e-24	47.1803	downregulate
ELAVL1	2.78857	14.689	3.29533	0.00106478	0.00593158	-1.96498	Upregulate
ANO6	-10.4037	14.0573	-2.99069	0.00294407	0.0141828	-2.89888	downregulate
LPIN1	-1.61859	1.94483	-3.85283	0.00013462	0.000982687	-0.0345802	downregulate
TNFAIP3	-24.1799	14.0704	-5.26663	2.20414e-07	2.87492e-06	6.09351	downregulate
ATF3	-145.994	27.3119	-13.1363	2.32765e-33	2.03308e-31	64.9812	downregulate
TAZ	2.12522	6.89239	2.75626	0.00609628	0.0261019	-3.55836	Upregulate
SIRT1	-4.59593	4.4259	-9.20075	1.57478e-18	5.06208e-17	31.216	downregulate
DNAJB6	-2.07399	6.76009	-3.42526	0.000673427	0.00399951	-1.54049	downregulate
LONP1	5.30259	20.9486	3.11916	0.00193611	0.00992545	-2.51558	Upregulate
NFE2L2	-21.5285	25.7588	-6.88529	2.0619e-11	4.10274e-10	15.1152	downregulate
SQSTM1	-18.5174	36.2254	-3.26279	0.00119154	0.00655127	-2.06887	downregulate
SLC3A2	19.4317	42.743	2.83454	0.00480632	0.0213774	-3.34392	Upregulate
CISD1	-2.48613	7.46952	-2.87005	0.00430726	0.0194584	-3.24471	downregulate
FANCD2	2.75232	3.82959	5.12689	4.46851e-07	5.55657e-06	5.41196	Upregulate
HSPA5	75.3262	188.71	3.70691	0.000237339	0.0016152	-0.567208	Upregulate
ATF4	-39.5226	123.795	-3.25331	0.00123098	0.00673015	-2.09892	downregulate
HELLS	1.76416	2.492	5.09603	5.21235e-07	6.39985e-06	5.26362	Upregulate
STAT3	-10.6138	23.236	-4.50037	8.75182e-06	8.44831e-05	2.55785	downregulate
NFS1	2.01041	5.67357	3.53488	0.000452395	0.00283012	-1.17028	Upregulate
CDKN1A	-135.109	88.915	-7.84655	3.44761e-14	8.30113e-13	21.3813	downregulate
CISD2	4.19686	12.4218	3.61755	0.000332862	0.00216969	-0.883837	Upregulate
ISCU	-8.35574	17.2432	-5.94913	5.6062e-09	8.9681e-08	9.65007	downregulate
OTUB1	8.15362	24.9299	4.39461	1.40079e-05	0.000129828	2.10926	Upregulate
JUN	-198.343	77.4137	-11.5724	3.88728e-27	2.15459e-25	50.7953	downregulate
ZFP36	-699.139	169.488	-15.792	1.32573e-44	3.90475e-42	90.644	downregulate
CAV1	-82.242	46.3037	-5.00772	8.06411e-07	9.63509e-06	4.84352	downregulate
GCH1	-2.86912	6.99024	-3.01123	0.0027559	0.0133961	-2.83864	downregulate
PTGS2	-53.8151	17.3828	-7.06618	6.49323e-12	1.34374e-10	16.2455	downregulate
DUSP1	-646.483	129.978	-18.6084	4.48063e-57	4.53977e-54	119.121	downregulate
UBC	-96.4481	189.371	-6.08776	2.5459e-09	4.22315e-08	10.4175	downregulate
OXSR1	-5.25616	12.5265	-3.62015	0.00032963	0.0021525	-0.874714	downregulate
ANGPTL7	-2.29818	0.235535	-13.8663	2.23062e-36	2.54512e-34	71.8676	downregulate
TSC22D3	-36.8053	22.7124	-8.72989	5.74769e-17	1.6563e-15	27.6718	downregulate
JDP2	-5.79871	4.0843	-7.11648	4.69008e-12	9.79387e-11	16.5639	downregulate
PCK2	8.72661	15.5465	3.84364	0.00013959	0.00101545	-0.068696	Upregulate
TXNIP	-115.187	148.063	-3.91799	0.0001039	0.000778403	0.209432	downregulate
VLDLR	-2.92097	2.07193	-5.79964	1.29206e-08	1.99074e-07	8.83929	downregulate
GPT2	4.36615	8.17186	2.61401	0.00926398	0.0371255	-3.93322	Upregulate
PSAT1	10.6942	17.3386	2.93263	0.0035413	0.0165074	-3.06702	Upregulate
TRIB3	7.44742	10.4858	2.7899	0.00550779	0.0240207	-3.46692	Upregulate
ARRDC3	-9.60586	16.2575	-3.05374	0.00240098	0.0119366	-2.71269	downregulate
IL6	-46.5903	7.25339	-8.79847	3.43024e-17	1.00448e-15	28.1801	downregulate
CXCL2	-19.8761	6.63103	-5.55943	4.7684e-08	6.88618e-07	7.57354	downregulate
RELA	-3.49541	20.6398	-2.77033	0.00584351	0.0251815	-3.52024	downregulate
SETD1B	-1.64894	5.74864	-3.42648	0.000670504	0.00398666	-1.53645	downregulate
MAFG	-4.81645	6.8422	-5.08129	5.60869e-07	6.87316e-06	5.19303	downregulate
IL33	-12.6276	6.71346	-3.76403	0.000190503	0.00133657	-0.360986	downregulate
STEAP3	8.57896	15.7081	3.59285	0.000365051	0.00234748	-0.970093	Upregulate
SLC2A3	-17.1197	9.02365	-5.27866	2.07246e-07	2.71997e-06	6.15297	downregulate
SLC2A6	4.70309	6.97533	2.78088	0.0056603	0.0245259	-3.49154	Upregulate
SLC2A8	-5.71788	8.71922	-3.83114	0.00014663	0.00106118	-0.114992	downregulate
SLC2A12	-1.07805	0.732124	-3.20361	0.00145851	0.00777739	-2.25525	downregulate
PLIN4	-26.4487	6.27306	-12.7871	6.1259e-32	4.71638e-30	61.742	downregulate
HIC1	-1.96961	1.33323	-5.21901	2.80916e-07	3.59556e-06	5.85947	downregulate
STMN1	38.6353	53.0869	2.5941	0.00980887	0.0389604	-3.98414	Upregulate
RRM2	13.4523	19.1987	3.00184	0.00284048	0.0137623	-2.86622	Upregulate
CAPG	66.8424	127.078	2.73206	0.0065541	0.0277664	-3.62348	Upregulate
YWHAE	45.9274	141.362	3.29708	0.00105833	0.00589954	-1.95937	Upregulate
AURKA	9.63079	11.5858	5.76812	1.5375e-08	2.3489e-07	8.67054	Upregulate
RIPK1	-2.89184	11.0774	-3.37731	0.000798829	0.00464623	-1.69896	downregulate
