# Supplementary material for: Development and validation of a novel model for predicting the survival of bladder cancer based on ferroptosis-related genes
Source: Aging (Albany NY). 2022 Nov 17;14(22):9037–55. doi: 10.18632/aging.204385 (PMC9740359; doi:10.18632/aging.204385)
Supplement: Supplementary Table 3 [file aging-14-204385-s004.xlsx]

## Sheet: lasso_class_tcga
Supplementary Table 3. RiskScore and risk group of BC patients in the TCGA database.
Patient_id	RiskScore	Risk
TCGA-G2-AA3B	0.263552	low
TCGA-E7-A4IJ	0.284807	low
TCGA-4Z-AA7M	0.306091	low
TCGA-KQ-A41O	0.312412	low
TCGA-CF-A47W	0.334686	low
TCGA-ZF-AA4U	0.343457	low
TCGA-DK-A1A7	0.347882	low
TCGA-ZF-A9R5	0.351159	low
TCGA-DK-A3X1	0.355443	low
TCGA-G2-A3IE	0.356663	low
TCGA-FD-A3SJ	0.356808	low
TCGA-DK-A1AD	0.363056	low
TCGA-DK-A1AG	0.365037	low
TCGA-FD-A43X	0.365951	low
TCGA-CF-A47Y	0.368747	low
TCGA-E7-A519	0.373215	low
TCGA-GC-A3BM	0.373926	low
TCGA-XF-A8HI	0.38229	low
TCGA-GV-A3QF	0.38383	low
TCGA-CF-A8HX	0.386471	low
TCGA-ZF-A9R2	0.391886	low
TCGA-DK-AA6P	0.392156	low
TCGA-CF-A47V	0.393269	low
TCGA-DK-A6B0	0.397963	low
TCGA-E7-A3X6	0.398687	low
TCGA-XF-A8HC	0.399693	low
TCGA-GU-A763	0.401661	low
TCGA-GD-A76B	0.404285	low
TCGA-BT-A2LA	0.406877	low
TCGA-CU-A3YL	0.40782	low
TCGA-4Z-AA89	0.408345	low
TCGA-4Z-AA7O	0.410588	low
TCGA-H4-A2HQ	0.414557	low
TCGA-E5-A4U1	0.415413	low
TCGA-ZF-A9RL	0.415928	low
TCGA-E7-A3Y1	0.41611	low
TCGA-ZF-A9R4	0.42589	low
TCGA-DK-A3IS	0.4262	low
TCGA-XF-A8HH	0.427853	low
TCGA-KQ-A41Q	0.430626	low
TCGA-E7-A85H	0.432464	low
TCGA-DK-A6B6	0.433973	low
TCGA-KQ-A41N	0.437094	low
TCGA-CF-A5UA	0.438733	low
TCGA-CF-A5U8	0.43961	low
TCGA-KQ-A41R	0.441198	low
TCGA-G2-A2EK	0.44176	low
TCGA-CF-A3MF	0.442209	low
TCGA-GV-A3JW	0.442404	low
TCGA-CF-A8HY	0.445073	low
TCGA-ZF-A9R7	0.445126	low
TCGA-DK-A2I1	0.447535	low
TCGA-DK-A1AA	0.449802	low
TCGA-DK-A6B1	0.451255	low
TCGA-4Z-AA87	0.452352	low
TCGA-GC-A3RD	0.452545	low
TCGA-GD-A6C6	0.454888	low
TCGA-E7-A678	0.457238	low
TCGA-UY-A78O	0.457284	low
TCGA-LT-A8JT	0.45863	low
TCGA-XF-A8HG	0.460064	low
TCGA-E7-A7PW	0.465264	low
TCGA-BT-A20P	0.466459	low
TCGA-CF-A47T	0.46686	low
TCGA-CF-A47X	0.466949	low
TCGA-XF-AAN1	0.469497	low
TCGA-E7-A8O7	0.469948	low
TCGA-DK-A3IK	0.47116	low
TCGA-ZF-AA4T	0.47484	low
TCGA-DK-AA76	0.476888	low
TCGA-E7-A6MD	0.478667	low
TCGA-CU-A3QU	0.479087	low
TCGA-GV-A6ZA	0.480658	low
TCGA-CF-A9FM	0.481073	low
TCGA-XF-A9T0	0.486559	low
TCGA-XF-AAMQ	0.489751	low
TCGA-CF-A9FL	0.490687	low
TCGA-CF-A47S	0.491775	low
TCGA-S5-AA26	0.493475	low
TCGA-GU-A767	0.495679	low
TCGA-GU-A42R	0.498019	low
TCGA-GU-AATP	0.498453	low
TCGA-DK-AA77	0.499314	low
TCGA-4Z-AA83	0.502408	low
TCGA-BL-A0C8	0.504924	low
TCGA-XF-A9SI	0.505041	low
TCGA-E7-A6ME	0.508148	low
TCGA-ZF-A9R1	0.508683	low
TCGA-4Z-AA7S	0.513986	low
TCGA-YF-AA3L	0.516238	low
TCGA-DK-A6B5	0.517883	low
TCGA-DK-AA6L	0.518463	low
TCGA-BT-A42C	0.52095	low
TCGA-FD-A5BV	0.526655	low
TCGA-XF-A8HF	0.527139	low
TCGA-GD-A2C5	0.534104	low
TCGA-XF-AAMJ	0.535181	low
TCGA-CF-A9FF	0.535418	low
TCGA-LT-A5Z6	0.535864	low
TCGA-4Z-AA7R	0.537571	low
TCGA-CF-A3MH	0.538147	low
TCGA-5N-A9KM	0.540324	low
TCGA-GU-A42P	0.542033	low
TCGA-FD-A3SQ	0.547482	low
TCGA-DK-A2I2	0.548258	low
TCGA-2F-A9KR	0.550206	low
TCGA-XF-AAMT	0.555656	low
TCGA-DK-AA75	0.55601	low
TCGA-C4-A0F6	0.558778	low
TCGA-UY-A9PD	0.559159	low
TCGA-R3-A69X	0.561087	low
TCGA-XF-AAMG	0.562252	low
TCGA-ZF-A9RM	0.563649	low
TCGA-GC-A3OO	0.56463	low
TCGA-DK-AA6X	0.565539	low
TCGA-CU-A3KJ	0.567641	low
TCGA-XF-AAN7	0.568154	low
TCGA-BT-A20W	0.570594	low
TCGA-GD-A3OP	0.57088	low
TCGA-G2-A3VY	0.571548	low
TCGA-FD-A3NA	0.572223	low
TCGA-XF-A9SK	0.580581	low
TCGA-2F-A9KP	0.581241	low
TCGA-E7-A4XJ	0.583235	low
TCGA-ZF-AA51	0.58586	low
TCGA-UY-A9PF	0.586385	low
TCGA-DK-AA74	0.588797	low
TCGA-BT-A20Q	0.59066	low
TCGA-ZF-AA4R	0.592747	low
TCGA-DK-AA71	0.595988	low
TCGA-CF-A7I0	0.598528	low
TCGA-XF-AAMZ	0.602096	low
TCGA-FD-A62S	0.603069	low
TCGA-GV-A3QK	0.608226	low
TCGA-DK-A3IN	0.608407	low
TCGA-GV-A3QI	0.60869	low
TCGA-DK-AA6S	0.609155	low
TCGA-ZF-A9RF	0.6095	low
TCGA-UY-A9PE	0.611001	low
TCGA-XF-A9SU	0.611037	low
TCGA-DK-A1A3	0.613053	low
TCGA-2F-A9KQ	0.61398	low
TCGA-KQ-A41P	0.614267	low
TCGA-FD-A5BR	0.614351	low
TCGA-H4-A2HO	0.616721	low
TCGA-S5-A6DX	0.61764	low
TCGA-DK-AA6T	0.619631	low
TCGA-K4-A3WS	0.620024	low
TCGA-GD-A3OS	0.621886	low
TCGA-GV-A40G	0.625989	low
TCGA-G2-A2EO	0.626467	low
TCGA-GV-A3JZ	0.626518	low
TCGA-XF-AAMR	0.630558	low
TCGA-UY-A9PH	0.63095	low
TCGA-DK-A3WY	0.634219	low
TCGA-DK-AA6M	0.636227	low
TCGA-XF-A9SH	0.637827	low
TCGA-UY-A9PA	0.638597	low
TCGA-DK-A3IV	0.640509	low
TCGA-XF-A9SP	0.640523	low
TCGA-CU-A5W6	0.640556	low
TCGA-CF-A3MI	0.640728	low
TCGA-DK-A1AC	0.641937	low
TCGA-FD-A3SL	0.642177	low
TCGA-FD-A5C1	0.643341	low
TCGA-CF-A3MG	0.646494	low
TCGA-BT-A42E	0.647572	low
TCGA-FJ-A3ZF	0.648706	low
TCGA-E7-A541	0.649373	low
TCGA-FD-A6TA	0.649748	low
TCGA-FJ-A3ZE	0.649774	low
TCGA-FD-A43S	0.651551	low
TCGA-FD-A5BY	0.65458	low
TCGA-DK-A2I6	0.654991	low
TCGA-DK-A2HX	0.655715	low
TCGA-K4-AAQO	0.656212	low
TCGA-ZF-AA4X	0.656516	low
TCGA-GU-A762	0.657639	low
TCGA-BT-A20N	0.657974	low
TCGA-FJ-A3Z7	0.658149	low
TCGA-ZF-A9R0	0.658503	low
TCGA-K4-A6FZ	0.662958	low
TCGA-FD-A6TD	0.663135	low
TCGA-CU-A0YO	0.663797	low
TCGA-MV-A51V	0.665574	low
TCGA-FD-A5BZ	0.667187	low
TCGA-GV-A3QH	0.669483	low
TCGA-ZF-AA4V	0.670148	low
TCGA-BL-A3JM	0.673636	low
TCGA-ZF-A9R9	0.676924	low
TCGA-UY-A78N	0.681123	low
TCGA-DK-AA6R	0.684101	low
TCGA-FD-A43P	0.684702	low
TCGA-G2-AA3F	0.686021	low
TCGA-XF-AAN0	0.687705	low
TCGA-FD-A62O	0.689358	low
TCGA-YF-AA3M	0.695799	low
TCGA-XF-AAML	0.697073	low
TCGA-DK-A6AW	0.698902	low
TCGA-K4-A4AC	0.700934	low
TCGA-FD-A62N	0.701256	low
TCGA-GC-A3I6	0.703625	low
TCGA-DK-A1A6	0.704833	low
TCGA-FD-A3B8	0.706605	low
TCGA-DK-AA6U	0.707144	low
TCGA-4Z-AA86	0.708558	low
TCGA-FJ-A3Z9	0.712478	low
TCGA-CF-A27C	0.713396	low
TCGA-DK-A2I4	0.714776	low
TCGA-FD-A3B5	0.714811	low
TCGA-BT-A2LB	0.715002	low
TCGA-XF-AAN2	0.71522	low
TCGA-GV-A3JV	0.71551	low
TCGA-FD-A3SO	0.716847	low
TCGA-DK-A6AV	0.717468	low
TCGA-PQ-A6FN	0.717675	low
TCGA-GU-A764	0.71871	low
TCGA-K4-A5RJ	0.719318	low
TCGA-BT-A42F	0.72086	low
TCGA-SY-A9G0	0.721443	low
TCGA-SY-A9G5	0.722316	low
TCGA-UY-A78M	0.722327	low
TCGA-UY-A8OD	0.727401	low
TCGA-UY-A8OB	0.729438	low
TCGA-GV-A3JX	0.731766	low
TCGA-UY-A78P	0.736763	low
TCGA-FD-A43U	0.738474	low
TCGA-GU-AATO	0.739052	low
TCGA-HQ-A5ND	0.742336	low
TCGA-4Z-AA84	0.742381	low
TCGA-XF-AAME	0.742527	low
TCGA-XF-A9T3	0.744078	low
TCGA-E5-A2PC	0.745937	low
TCGA-G2-A2EF	0.746284	low
TCGA-FD-A3B3	0.748201	low
TCGA-C4-A0EZ	0.750601	low
TCGA-E7-A7DV	0.752139	low
TCGA-GC-A3YS	0.753639	low
TCGA-2F-A9KO	0.753976	low
TCGA-4Z-AA7Q	0.75421	low
TCGA-GC-A3RB	0.755006	low
TCGA-E7-A6MF	0.756048	low
TCGA-DK-A3IM	0.760176	low
TCGA-G2-AA3D	0.760371	low
TCGA-FD-A5BS	0.761675	low
TCGA-UY-A9PB	0.762378	low
TCGA-E7-A7XN	0.763416	low
TCGA-FD-A3SN	0.764582	low
TCGA-FD-A3B4	0.764766	low
TCGA-E7-A97Q	0.765009	low
TCGA-FD-A3SP	0.769662	low
TCGA-G2-A2EC	0.770404	low
TCGA-K4-A6MB	0.771196	low
TCGA-ZF-AA4W	0.771926	low
TCGA-ZF-A9RC	0.77966	low
TCGA-GC-A3RC	0.780874	low
TCGA-K4-A5RI	0.781615	low
TCGA-FD-A6TE	0.782079	low
TCGA-YC-A89H	0.782124	low
TCGA-ZF-AA58	0.78859	low
TCGA-HQ-A5NE	0.793288	low
TCGA-BT-A20T	0.797195	low
TCGA-HQ-A2OE	0.798472	low
TCGA-GU-A766	0.799587	low
TCGA-ZF-AA5H	0.800675	low
TCGA-DK-A3IL	0.801524	low
TCGA-XF-A9SL	0.802713	low
TCGA-XF-A9SM	0.80337	low
TCGA-FD-A43N	0.803536	high
TCGA-E7-A97P	0.805457	high
TCGA-BT-A3PH	0.807924	high
TCGA-XF-AAMY	0.808135	high
TCGA-XF-AAN5	0.811891	high
TCGA-FD-A6TF	0.815178	high
TCGA-BT-A20J	0.815335	high
TCGA-XF-AAN4	0.816406	high
TCGA-G2-AA3C	0.816709	high
TCGA-ZF-AA52	0.817582	high
TCGA-FD-A3B7	0.817605	high
TCGA-ZF-AA53	0.818075	high
TCGA-FD-A6TK	0.824029	high
TCGA-K4-A3WV	0.824513	high
TCGA-BT-A20X	0.830528	high
TCGA-4Z-AA7Y	0.835302	high
TCGA-UY-A78K	0.837979	high
TCGA-XF-A9T5	0.838813	high
TCGA-ZF-A9R3	0.843186	high
TCGA-CF-A1HR	0.844203	high
TCGA-FD-A6TB	0.847237	high
TCGA-DK-A6B2	0.847555	high
TCGA-DK-A3WW	0.858632	high
TCGA-4Z-AA7W	0.859412	high
TCGA-DK-A3WX	0.864358	high
TCGA-2F-A9KT	0.864773	high
TCGA-CU-A72E	0.869203	high
TCGA-ZF-AA5P	0.870162	high
TCGA-PQ-A6FI	0.870582	high
TCGA-4Z-AA82	0.871965	high
TCGA-CU-A0YR	0.873487	high
TCGA-DK-A1AF	0.877087	high
TCGA-FD-A5BX	0.885129	high
TCGA-BT-A3PK	0.885989	high
TCGA-LC-A66R	0.890107	high
TCGA-DK-A3IQ	0.894139	high
TCGA-DK-A1AB	0.894666	high
TCGA-GU-AATQ	0.895088	high
TCGA-DK-A3IT	0.896114	high
TCGA-XF-AAMX	0.898126	high
TCGA-E5-A4TZ	0.898143	high
TCGA-XF-A9SZ	0.898193	high
TCGA-CU-A0YN	0.898396	high
TCGA-BT-A20V	0.898596	high
TCGA-ZF-A9RN	0.902991	high
TCGA-XF-A9SW	0.904398	high
TCGA-FD-A6TG	0.907548	high
TCGA-FD-A3N6	0.911601	high
TCGA-XF-A8HB	0.91318	high
TCGA-GD-A3OQ	0.917038	high
TCGA-XF-A8HE	0.919256	high
TCGA-XF-A8HD	0.923251	high
TCGA-4Z-AA81	0.927994	high
TCGA-DK-AA6W	0.930099	high
TCGA-XF-A9T6	0.930313	high
TCGA-K4-A5RH	0.931731	high
TCGA-K4-A3WU	0.935243	high
TCGA-FD-A5BT	0.937063	high
TCGA-FD-A3SM	0.93842	high
TCGA-XF-AAMW	0.938906	high
TCGA-FD-A3SR	0.944059	high
TCGA-BT-A0S7	0.954511	high
TCGA-XF-A9T4	0.957925	high
TCGA-ZF-AA56	0.96146	high
TCGA-E7-A677	0.961633	high
TCGA-FJ-A871	0.963632	high
TCGA-DK-A3X2	0.969217	high
TCGA-C4-A0F1	0.974534	high
TCGA-K4-A54R	0.979445	high
TCGA-YC-A8S6	0.986075	high
TCGA-FD-A62P	0.98762	high
TCGA-G2-A2EL	0.988588	high
TCGA-FD-A5BU	0.9897	high
TCGA-FT-A3EE	0.995762	high
TCGA-KQ-A41S	0.999333	high
TCGA-XF-A9SY	1.0031	high
TCGA-XF-A9T8	1.00396	high
TCGA-5N-A9KI	1.01577	high
TCGA-BT-A3PJ	1.01767	high
TCGA-ZF-A9RD	1.0278	high
TCGA-XF-A9SJ	1.03268	high
TCGA-DK-A3IU	1.03466	high
TCGA-BL-A13J	1.04012	high
TCGA-FD-A3N5	1.04554	high
TCGA-C4-A0F7	1.05996	high
TCGA-2F-A9KW	1.06152	high
TCGA-DK-AA6Q	1.06488	high
TCGA-FD-A43Y	1.07186	high
TCGA-FD-A6TI	1.11431	high
TCGA-K4-A83P	1.11862	high
TCGA-FT-A61P	1.12624	high
TCGA-G2-A2EJ	1.12819	high
TCGA-BT-A20O	1.12867	high
TCGA-XF-A9SX	1.13517	high
TCGA-XF-AAN3	1.13679	high
TCGA-BT-A20U	1.13838	high
TCGA-G2-A2ES	1.14696	high
TCGA-XF-A9SV	1.18692	high
TCGA-FD-A5C0	1.19517	high
TCGA-GC-A3WC	1.20271	high
TCGA-ZF-A9RE	1.21983	high
TCGA-ZF-AA5N	1.22905	high
TCGA-G2-A3IB	1.24023	high
TCGA-4Z-AA7N	1.25319	high
TCGA-C4-A0F0	1.25477	high
TCGA-BT-A2LD	1.29722	high
TCGA-BT-A20R	1.30216	high
TCGA-FD-A3B6	1.30423	high
TCGA-BT-A0YX	1.32688	high
TCGA-XF-AAN8	1.35244	high
TCGA-BL-A13I	1.35827	high
TCGA-BL-A5ZZ	1.36927	high
TCGA-DK-A1A5	1.39276	high
TCGA-UY-A78L	1.39413	high
TCGA-XF-AAMH	1.40002	high
TCGA-ZF-AA54	1.48241	high
TCGA-GV-A40E	1.5767	high
TCGA-XF-A9T2	1.60096	high
TCGA-DK-A1AE	1.62876	high
TCGA-XF-A9ST	1.84089	high
TCGA-FD-A3SS	1.8416	high
TCGA-GU-A42Q	1.84162	high
TCGA-FD-A6TC	1.90494	high
TCGA-FD-A6TH	2.65664	high
