# Supplementary material for: Development and validation of a novel model for predicting the survival of bladder cancer based on ferroptosis-related genes
Source: Aging (Albany NY). 2022 Nov 17;14(22):9037–55. doi: 10.18632/aging.204385 (PMC9740359; doi:10.18632/aging.204385)
Supplement: Supplementary Table 4 [file aging-14-204385-s005.xlsx]

## Sheet: lasso_class_geo
Supplementary Table 4. RiskScore and risk group of BC patients in the GSE13507 database.
Patient_id	RiskScore	Risk
GSM340606	0.729426	low
GSM340605	0.73085	low
GSM340668	0.738096	low
GSM340613	0.758495	low
GSM340716	0.759247	low
GSM340609	0.76152	low
GSM340738	0.762341	low
GSM340621	0.765422	low
GSM340643	0.765628	low
GSM340624	0.765868	low
GSM340646	0.766243	low
GSM340630	0.766734	low
GSM340632	0.767665	low
GSM340657	0.769094	low
GSM340638	0.76965	low
GSM340608	0.769953	low
GSM340644	0.770593	low
GSM340625	0.770857	low
GSM340631	0.772227	low
GSM340685	0.772728	low
GSM340691	0.77286	low
GSM340617	0.773548	low
GSM340626	0.773601	low
GSM340680	0.773844	low
GSM340649	0.774718	low
GSM340648	0.774979	low
GSM340753	0.775899	low
GSM340627	0.777364	low
GSM340637	0.777776	low
GSM340667	0.778167	low
GSM340729	0.778988	low
GSM340707	0.779386	low
GSM340717	0.780407	low
GSM340748	0.781079	low
GSM340730	0.781267	low
GSM340726	0.781515	low
GSM340635	0.781769	low
GSM340754	0.782364	low
GSM340652	0.784101	low
GSM340658	0.784175	low
GSM340743	0.784186	low
GSM340647	0.784471	low
GSM340639	0.784664	low
GSM340735	0.785035	low
GSM340757	0.785301	low
GSM340737	0.785388	low
GSM340741	0.785798	low
GSM340713	0.786181	low
GSM340615	0.786244	low
GSM340659	0.786623	low
GSM340661	0.786754	low
GSM340686	0.787507	low
GSM340677	0.787663	low
GSM340669	0.787844	low
GSM340619	0.789301	low
GSM340700	0.789311	low
GSM340682	0.789373	low
GSM340633	0.790393	low
GSM340755	0.790851	low
GSM340708	0.791308	low
GSM340740	0.791841	low
GSM340611	0.791917	low
GSM340620	0.792408	low
GSM340756	0.792594	low
GSM340736	0.793032	low
GSM340688	0.793174	low
GSM340641	0.793297	low
GSM340622	0.793463	low
GSM340765	0.793483	low
GSM340676	0.793508	low
GSM340760	0.793732	low
GSM340768	0.793975	low
GSM340721	0.794804	low
GSM340712	0.794863	low
GSM340616	0.794868	low
GSM340634	0.795891	low
GSM340642	0.795966	low
GSM340650	0.796103	low
GSM340752	0.796808	low
GSM340694	0.797069	low
GSM340692	0.79799	low
GSM340690	0.79848	low
GSM340614	0.798644	low
GSM340703	0.798645	low
GSM340666	0.799144	low
GSM340664	0.799837	low
GSM340723	0.799937	low
GSM340683	0.800088	low
GSM340610	0.800262	low
GSM340675	0.800488	low
GSM340671	0.800726	low
GSM340698	0.800832	low
GSM340636	0.800997	low
GSM340665	0.801512	low
GSM340623	0.80213	low
GSM340725	0.803321	low
GSM340651	0.803418	high
GSM340640	0.803554	high
GSM340747	0.803803	high
GSM340653	0.80406	high
GSM340722	0.8046	high
GSM340695	0.80551	high
GSM340751	0.805643	high
GSM340693	0.806153	high
GSM340662	0.80648	high
GSM340702	0.806784	high
GSM340689	0.807152	high
GSM340745	0.807255	high
GSM340645	0.808594	high
GSM340764	0.808805	high
GSM340681	0.809645	high
GSM340739	0.809999	high
GSM340656	0.810861	high
GSM340744	0.811338	high
GSM340719	0.811458	high
GSM340607	0.812323	high
GSM340767	0.812451	high
GSM340706	0.812576	high
GSM340724	0.81274	high
GSM340628	0.814899	high
GSM340618	0.816395	high
GSM340711	0.816439	high
GSM340655	0.816608	high
GSM340734	0.817424	high
GSM340727	0.817583	high
GSM340679	0.818092	high
GSM340710	0.821097	high
GSM340718	0.821354	high
GSM340742	0.821444	high
GSM340654	0.823425	high
GSM340749	0.826881	high
GSM340762	0.82911	high
GSM340697	0.830385	high
GSM340629	0.836524	high
GSM340672	0.837813	high
GSM340761	0.839528	high
GSM340758	0.839695	high
GSM340678	0.840104	high
GSM340766	0.846211	high
GSM340673	0.846432	high
GSM340720	0.84682	high
GSM340715	0.846869	high
GSM340763	0.84708	high
GSM340705	0.847642	high
GSM340612	0.853461	high
GSM340663	0.854041	high
GSM340769	0.855418	high
GSM340684	0.855944	high
GSM340732	0.859276	high
GSM340709	0.860487	high
GSM340731	0.862271	high
GSM340687	0.865115	high
GSM340728	0.865908	high
GSM340670	0.866531	high
GSM340746	0.868092	high
GSM340733	0.868638	high
GSM340759	0.873912	high
GSM340696	0.881315	high
GSM340674	0.889018	high
GSM340704	0.89617	high
GSM340701	0.906296	high
GSM340660	0.915192	high
GSM340699	0.919577	high
GSM340714	0.924418	high
GSM340750	0.930495	high
